# Supplementary material for: Statistical Dissection of the Genetic Determinants of Phenotypic Heterogeneity in Genes with Multiple Associated Rare Diseases
Source: Genes (Basel). 2023 Nov 18;14(11):2100. doi: 10.3390/genes14112100 (PMC10671084; doi:10.3390/genes14112100)
Supplement: Supplementary file 1 [file genes-14-02100-s001.zip › Supplementary Table S1.xlsx]

## Sheet: Лист4
GMDs linked to exactly 2 conditions with more than 50% shared causal variants
Gene	Number of pleiotropic variants	Percent of pleiotropic variants	Mode of inheritance of associated diseases	OMIM1	OMIM2	Jaccard_UpperTerms
FOXI1	1	100	2AR	OMIM:274600	OMIM:600791	0.33333333
MYH8	1	100	2AD	OMIM:158300	OMIM:608837	0.33333333
NHP2	3	100	2AR	OMIM:224230	OMIM:613987	0.42857143
SEMA4A	1	100	2AR	OMIM:610282	OMIM:610283	0.2
BRIP1	395	94.7242206	ADAR	OMIM:114480	OMIM:609054	0
CLCN1	160	91.4285714	ADAR	OMIM:160800	OMIM:255700	0.5
BAG3	73	90.1234568	2AD	OMIM:612954	OMIM:613881	0.1
GNPTAB	265	89.8305085	2AR	OMIM:252600	OMIM:252500	0.42307692
GYG1	16	88.8888889	2AR	OMIM:613507	OMIM:616199	0.16666667
DST	88	87.1287129	2AR	OMIM:614653	OMIM:615425	0.15789474
PEX10	31	86.1111111	2AR	OMIM:614870	OMIM:614871	0.25
NEXN	12	85.7142857	2AD	OMIM:613122	OMIM:613876	1
SDHC	41	85.4166667	2AD	OMIM:605373	OMIM:606764	0.30769231
KIAA0586	74	85.0574713	2AR	OMIM:616490	OMIM:616546	0.4
PLEKHG5	27	84.375	2AR	OMIM:611067	OMIM:615376	0.57142857
JUP	16	84.2105263	ADAR	OMIM:601214	OMIM:611528	0.75
TCTN3	32	84.2105263	2AR	OMIM:258860	OMIM:614815	0.46153846
PHOX2B	5	83.3333333	2AD	OMIM:613013	OMIM:209880	0.27272727
RTEL1	111	82.8358209	ADAR	OMIM:615190	OMIM:616373	0.09090909
TMEM216	14	82.3529412	2AR	OMIM:603194	OMIM:608091	0.4375
DNAH1	50	81.9672131	2AR	OMIM:617576	OMIM:617577	0.16666667
COL12A1	48	81.3559322	ADAR	OMIM:616470	OMIM:616471	0.4
IGHMBP2	77	80.2083333	2AR	OMIM:604320	OMIM:616155	0.28571429
POMK	12	80	2AR	OMIM:615249	OMIM:616094	0.45454545
TMEM231	19	79.1666667	2AR	OMIM:615397	OMIM:614970	0.44444444
SDCCAG8	37	78.7234043	2AR	OMIM:613615	OMIM:615993	0.27272727
PEX26	17	77.2727273	2AR	OMIM:614872	OMIM:614873	0.28571429
APOB	71	77.173913	ADAR	OMIM:144010	OMIM:615558	0.25
NAGLU	142	75.1322751	ADAR	OMIM:252920	OMIM:616491	0.06666667
DAG1	6	75	2AR	OMIM:613818	OMIM:616538	0.45454545
DIAPH1	21	75	ADAR	OMIM:124900	OMIM:616632	0
HADHA	105	75	2AR	OMIM:609015	OMIM:609016	0.3125
TFG	3	75	ADAR	OMIM:604484	OMIM:615658	0.4
GRN	53	74.6478873	ADAR	OMIM:607485	OMIM:614706	0.33333333
SMPD1	193	74.5173745	2AR	OMIM:257200	OMIM:607616	0.5
SYNJ1	26	74.2857143	2AR	OMIM:615530	OMIM:617389	0.375
OPTN	22	73.3333333	ADAR	OMIM:137760	OMIM:613435	0
TRPS1	62	72.9411765	2AD	OMIM:190350	OMIM:190351	0.63636364
SEC23B	18	72	ADAR	OMIM:224100	OMIM:616858	0.17647059
KCNT1	34	70.8333333	2AD	OMIM:614959	OMIM:615005	0.4
EVC2	166	70.3389831	ADAR	OMIM:193530	OMIM:225500	0.45454545
ELANE	32	69.5652174	2AD	OMIM:162800	OMIM:202700	0.375
RPGRIP1	75	68.8073394	2AR	OMIM:608194	OMIM:613826	0.75
SIGMAR1	11	68.75	2AR	OMIM:614373	OMIM:605726	0.6
ATP13A2	35	67.3076923	2AR	OMIM:606693	OMIM:617225	0.5
HGSNAT	77	66.9565217	2AR	OMIM:252930	OMIM:616544	0.1
COL8A2	2	66.6666667	2AD	OMIM:136800	OMIM:609140	0.5
PARN	24	66.6666667	ADAR	OMIM:616353	OMIM:616371	0.22222222
EVC	137	64.6226415	ADAR	OMIM:193530	OMIM:225500	0.45454545
GNE	77	63.6363636	ADAR	OMIM:269921	OMIM:605820	0.17391304
MUSK	17	62.962963	2AR	OMIM:208150	OMIM:616325	0.29411765
LAMB2	30	62.5	2AR	OMIM:609049	OMIM:614199	0.25
CUBN	19	61.2903226	2AR	OMIM:261100	OMIM:618884	0.5
RELN	29	60.4166667	ADAR	OMIM:257320	OMIM:616436	0.2
WNK1	29	60.4166667	ADAR	OMIM:201300	OMIM:614492	0.08333333
CRPPA	21	60	2AR	OMIM:614643	OMIM:616052	0.5
HBA2	6	60	2AD	OMIM:140700	OMIM:617981	1
WDR35	21	60	2AR	OMIM:613610	OMIM:614091	0.43478261
CLRN1	7	58.3333333	2AR	OMIM:276902	OMIM:614180	0.33333333
LAMA2	187	57.7160494	2AR	OMIM:607855	OMIM:618138	0.55555556
CALM1	8	57.1428571	2AD	OMIM:614916	OMIM:616247	0.5
CARD14	4	57.1428571	2AD	OMIM:173200	OMIM:602723	0.25
GOSR2	4	57.1428571	2AR	OMIM:620166	OMIM:614018	0
CRX	27	56.25	ADAR	OMIM:120970	OMIM:613829	0.33333333
FUS	15	55.5555556	2AD	OMIM:608030	OMIM:614782	0.5
INF2	20	55.5555556	2AD	OMIM:613237	OMIM:614455	0.28571429
RPGR	5	55.5555556	2XL	OMIM:300834	OMIM:300455	0.16666667
TTC21B	13	54.1666667	ADAR	OMIM:613820	OMIM:613819	0.2
FGA	8	53.3333333	ADAR	OMIM:202400	OMIM:105200	0.38461538
HPD	8	53.3333333	ADAR	OMIM:140350	OMIM:276710	0.33333333
PAX2	26	53.0612245	2AD	OMIM:120330	OMIM:616002	0.2
IBA57	14	51.8518519	2AR	OMIM:615330	OMIM:616451	0.21428571
ADAR	27	50.9433962	ADAR	OMIM:127400	OMIM:615010	0.05882353
USH2A	266	50.8604207	2AR	OMIM:276901	OMIM:613809	0.33333333
