# Supplementary material for: Statistical Dissection of the Genetic Determinants of Phenotypic Heterogeneity in Genes with Multiple Associated Rare Diseases
Source: Genes (Basel). 2023 Nov 18;14(11):2100. doi: 10.3390/genes14112100 (PMC10671084; doi:10.3390/genes14112100)
Supplement: Supplementary file 1 [file genes-14-02100-s001.zip › Supplementary Table S2.xlsx]

## Sheet: bins5
List of GMDs with significant and nominally significant differences in variant localization for the two associated diseases within CDS (bins=5)
GENE	Ensembl	pLI	oe_lof_upper	oe_lof_upper_bin	Mode of inheritance of associated diseases	OMIM1_bin1	OMIM1_bin2	OMIM1_bin2	OMIM1_bin4	OMIM1_bin5	OMIM2_bin1	OMIM2_bin2	OMIM2_bin2	OMIM2_bin4	OMIM2_bin5	OMIM1	OMIM2	p-value	FDR-adjusted p-value	Jaccard_UpperTerms
ANKH	ENSG00000154122	2.79E-01	4.99E-01	2	2AD	0	2	0	0	4	0	6	0	0	0	OMIM:118600	OMIM:123000	6.06E-02	6.69E-01	9.09E-02
CDKN1C	ENSG00000129757	8.20E-01	5.29E-01	2	2AD	16	21	9	18	17	8	0	0	0	0	OMIM:130650	OMIM:614732	1.93E-04	4.11E-02	4.17E-01
CENPJ	ENSG00000151849	2.06E-27	9.72E-01	5	2AR	5	1	3	1	7	1	2	3	4	1	OMIM:608393	OMIM:613676	7.53E-02	6.93E-01	5.00E-01
COL3A1	ENSG00000168542	1.00E+00	9.80E-02	0	ADAR	102	110	165	177	32	2	4	6	0	2	OMIM:130050	OMIM:618343	2.43E-02	3.73E-01	3.91E-01
COL4A4	ENSG00000081052	6.71E-16	6.16E-01	3	ADAR	10	6	14	25	15	29	36	43	39	29	OMIM:141200	OMIM:203780	6.00E-02	6.69E-01	3.33E-01
CREBBP	ENSG00000005339	1.00E+00	6.60E-02	0	2AD	23	43	56	33	41	1	9	1	0	0	OMIM:180849	OMIM:618332	6.51E-04	4.49E-02	4.69E-01
DEAF1	ENSG00000177030	3.41E-04	6.98E-01	3	ADAR	0	0	14	6	1	1	3	2	4	0	OMIM:615828	OMIM:617171	7.90E-03	2.18E-01	3.75E-01
DMD	ENSG00000198947	1.00E+00	1.54E-01	0	2XL	40	19	45	37	36	153	168	207	230	231	OMIM:300376	OMIM:310200	3.22E-02	4.68E-01	5.00E-01
F8	ENSG00000185010	1.00E+00	8.90E-02	0	2XL	7	5	5	4	4	109	60	20	68	113	OMIM:301071	OMIM:306700	7.13E-02	6.93E-01	3.33E-01
FLT4	ENSG00000037280	1.00E+00	1.47E-01	0	2AD	6	8	0	0	0	6	0	1	3	2	OMIM:153100	OMIM:618780	1.34E-03	7.38E-02	8.33E-02
FN1	ENSG00000115414	1.40E-03	3.38E-01	1	2AD	0	0	0	1	6	0	4	1	1	0	OMIM:184255	OMIM:601894	2.33E-03	9.19E-02	0.00E+00
HTRA1	ENSG00000166033	4.92E-04	7.52E-01	4	ADAR	2	0	2	5	1	1	6	5	4	0	OMIM:600142	OMIM:616779	6.82E-02	6.93E-01	2.00E-01
KCNQ2	ENSG00000075043	1.00E+00	1.58E-01	0	2AD	8	18	20	48	14	6	19	14	85	14	OMIM:121200	OMIM:613720	8.29E-02	7.15E-01	5.00E-01
KLHL7	ENSG00000122550	4.56E-05	6.43E-01	3	ADAR	0	4	0	1	0	0	2	6	4	0	OMIM:612943	OMIM:617055	3.60E-02	4.97E-01	2.00E-01
KMT2D	ENSG00000167548	1.00E+00	1.03E-01	0	2AD	104	99	64	90	61	0	6	0	0	0	OMIM:147920	OMIM:620186	1.60E-03	7.38E-02	0.00E+00
MADD	ENSG00000110514	1.54E-14	5.76E-01	2	2AR	3	0	1	1	0	0	2	0	3	0	OMIM:619004	OMIM:619005	7.94E-02	7.07E-01	6.67E-01
MAF	ENSG00000178573	7.44E-01	5.37E-01	2	2AD	0	3	0	1	8	0	8	0	1	1	OMIM:601088	OMIM:610202	1.21E-02	2.39E-01	8.33E-02
NDP	ENSG00000124479	6.50E-01	8.76E-01	4	2XL	4	0	2	0	0	2	7	7	5	3	OMIM:305390	OMIM:310600	2.33E-02	3.73E-01	2.00E-01
NFIX	ENSG00000008441	9.99E-01	1.49E-01	0	2AD	14	10	6	19	3	19	17	4	5	1	OMIM:602535	OMIM:614753	1.36E-02	2.50E-01	5.00E-01
NOTCH1	ENSG00000148400	1.00E+00	9.70E-02	0	2AD	2	8	10	3	1	1	6	12	11	14	OMIM:109730	OMIM:616028	1.15E-02	2.39E-01	1.25E-01
NOTCH2	ENSG00000134250	1.00E+00	1.16E-01	0	2AD	22	3	4	3	1	3	4	0	1	1	OMIM:102500	OMIM:610205	4.87E-02	6.40E-01	2.22E-01
OCRL	ENSG00000122126	1.00E+00	1.55E-01	0	2XL	6	3	4	1	3	0	24	15	10	9	OMIM:300555	OMIM:309000	2.98E-04	4.11E-02	2.22E-01
ROR2	ENSG00000169071	0.00012401	0.558	2	ADAR	1	4	3	1	0	0	6	7	12	6	OMIM:113000	OMIM:268310	6.67E-02	6.93E-01	4.38E-01
SETBP1	ENSG00000152217	1	0.11	0	2AD	0	5	10	1	0	7	14	6	6	3	OMIM:269150	OMIM:616078	1.20E-02	2.39E-01	4.35E-01
SMARCA2	ENSG00000080503	1	0.203	0	2AD	0	3	17	23	1	0	4	2	2	0	OMIM:601358	OMIM:619293	2.39E-02	3.73E-01	5.65E-01
SMARCA4	ENSG00000127616	1	0.055	0	2AD	23	21	20	21	10	0	6	9	9	0	OMIM:613325	OMIM:614609	5.83E-03	1.79E-01	0.00E+00
SMC1A	ENSG00000072501	1	0.062	0	2XL	26	21	22	9	26	6	5	5	3	0	OMIM:300590	OMIM:301044	7.29E-02	6.93E-01	5.29E-01
SPTB	ENSG00000070182	1	0.14	0	2AD	8	13	11	13	12	6	0	1	0	0	OMIM:616649	OMIM:617948	5.66E-04	4.49E-02	3.75E-01
SPTBN2	ENSG00000173898	9.93E-05	0.357	1	ADAR	2	1	0	2	9	2	0	1	4	1	OMIM:600224	OMIM:615386	5.37E-02	6.44E-01	6.00E-01
SRCAP	ENSG00000080603	1	0.096	0	ADAR	0	0	0	11	5	1	2	2	2	1	OMIM:136140	OMIM:619595	5.35E-03	1.79E-01	5.00E-01
STUB1	ENSG00000103266	0.018667	0.68	3	ADAR	0	4	5	5	3	2	2	0	5	7	OMIM:615768	OMIM:618093	5.24E-02	6.44E-01	9.09E-02
TEK	ENSG00000120156	1	0.179	0	2AD	0	0	0	5	2	4	1	0	0	2	OMIM:600195	OMIM:617272	1.17E-02	2.39E-01	0.00E+00

## Sheet: bins5_wo_pleiotropic_variants
List of GMDs with significant and nominally significant differences in variant localization for the two associated diseases within CDS (bins=5, w/p pleiotropic variants)
GENE	Ensembl	pLI	oe_lof_upper	oe_lof_upper_bin	Mode of inheritance of associated diseases	OMIM1_bin1	OMIM1_bin2	OMIM1_bin2	OMIM1_bin4	OMIM1_bin5	OMIM2_bin1	OMIM2_bin2	OMIM2_bin2	OMIM2_bin4	OMIM2_bin5	OMIM1	OMIM2	p-value	FDR-adjusted p-value	Jaccard_UpperTerms
APOB	ENSG00000084674	1.92E-16	4.61E-01	2	ADAR	3	4	0	1	3	0	0	2	3	4	OMIM:144010	OMIM:615558	3.58E-02	1.52E-01	2.50E-01
ASAH1	ENSG00000104763	1.26E-12	1.18E+00	6	2AR	1	2	0	1	4	7	3	8	14	7	OMIM:228000	OMIM:159950	9.54E-02	2.77E-01	2.86E-01
ATM	ENSG00000149311	5.59E-47	7.10E-01	3	ADAR	7	7	9	13	19	271	287	244	269	283	OMIM:208900	OMIM:114480	9.53E-02	2.77E-01	5.00E-02
ATP13A2	ENSG00000159363	8.96E-09	5.84E-01	3	2AR	0	6	5	2	0	2	0	2	2	2	OMIM:606693	OMIM:617225	1.81E-02	9.40E-02	5.00E-01
CDKN1C	ENSG00000129757	8.20E-01	5.29E-01	2	2AD	13	21	9	18	17	5	0	0	0	0	OMIM:130650	OMIM:614732	1.13E-03	2.05E-02	4.17E-01
CENPJ	ENSG00000151849	2.06E-27	9.72E-01	5	2AR	5	0	2	1	6	1	1	2	4	0	OMIM:608393	OMIM:613676	1.85E-02	9.40E-02	5.00E-01
CNTNAP1	ENSG00000108797	3.45E-05	4.22E-01	2	2AR	0	2	2	4	1	1	1	5	0	0	OMIM:618186	OMIM:616286	6.87E-02	2.47E-01	6.92E-01
COL4A3	ENSG00000169031	1.07E-12	5.22E-01	2	ADAR	11	5	18	11	5	25	29	29	22	25	OMIM:203780	OMIM:104200	8.95E-02	2.73E-01	1.00E+00
COL4A4	ENSG00000081052	6.71E-16	6.16E-01	3	ADAR	0	2	5	7	6	19	32	34	21	20	OMIM:141200	OMIM:203780	3.75E-02	1.52E-01	3.33E-01
COL6A1	ENSG00000142156	1.00E+00	2.27E-01	0	ADAR	10	38	5	3	1	1	2	4	2	0	OMIM:158810	OMIM:254090	7.55E-03	5.75E-02	5.00E-01
CREBBP	ENSG00000005339	1.00E+00	6.60E-02	0	2AD	23	42	55	33	41	1	8	0	0	0	OMIM:180849	OMIM:618332	2.47E-04	1.50E-02	4.69E-01
DEAF1	ENSG00000177030	3.41E-04	6.98E-01	3	ADAR	0	0	13	5	1	1	3	1	3	0	OMIM:617171	OMIM:615828	2.71E-03	2.76E-02	3.75E-01
EVC2	ENSG00000173040	1.02E-34	1.06E+00	5	ADAR	4	0	1	0	0	7	9	12	14	11	OMIM:193530	OMIM:225500	7.05E-03	5.75E-02	4.55E-01
F8	ENSG00000185010	1.00E+00	8.90E-02	0	2XL	4	4	4	0	1	106	59	19	64	110	OMIM:306700	OMIM:301071	2.00E-03	2.40E-02	3.33E-01
FLT4	ENSG00000037280	1.00E+00	1.47E-01	0	2AD	6	8	0	0	0	6	0	1	3	2	OMIM:618780	OMIM:153100	1.34E-03	2.05E-02	8.33E-02
FN1	ENSG00000115414	1.40E-03	3.38E-01	1	2AD	0	0	0	0	6	0	4	1	0	0	OMIM:601894	OMIM:184255	2.16E-03	2.40E-02	0.00E+00
GLI2	ENSG00000074047	9.73E-01	3.09E-01	1	2AD	2	3	0	2	1	1	2	6	0	1	OMIM:610829	OMIM:615849	4.33E-02	1.65E-01	8.89E-01
HTRA1	ENSG00000166033	4.92E-04	7.52E-01	4	ADAR	2	0	2	3	1	1	6	5	2	0	OMIM:600142	OMIM:616779	8.53E-02	2.73E-01	2.00E-01
KCNQ2	ENSG00000075043	1.00E+00	1.58E-01	0	2AD	7	13	13	25	10	5	14	7	62	10	OMIM:121200	OMIM:613720	1.03E-02	7.00E-02	5.00E-01
KLHL7	ENSG00000122550	4.56E-05	6.43E-01	3	ADAR	0	4	0	1	0	0	2	6	4	0	OMIM:617055	OMIM:612943	3.60E-02	1.52E-01	2.00E-01
KMT2D	ENSG00000167548	1.00E+00	1.03E-01	0	2AD	104	99	64	90	61	0	6	0	0	0	OMIM:147920	OMIM:620186	1.60E-03	2.18E-02	0.00E+00
LPL	ENSG00000175445	1.27E-09	1.10E+00	6	ADAR	0	0	1	4	2	1	6	17	4	4	OMIM:238600	OMIM:144250	3.56E-02	1.52E-01	2.50E-01
MADD	ENSG00000110514	1.54E-14	5.76E-01	2	2AR	3	0	1	1	0	0	2	0	3	0	OMIM:619004	OMIM:619005	7.94E-02	2.62E-01	6.67E-01
MAF	ENSG00000178573	7.44E-01	5.37E-01	2	2AD	0	0	0	0	7	0	5	0	0	0	OMIM:610202	OMIM:601088	1.26E-03	2.05E-02	8.33E-02
NALCN	ENSG00000102452	8.52E-14	5.22E-01	2	ADAR	4	6	7	4	4	1	7	3	12	9	OMIM:615419	OMIM:616266	7.56E-02	2.61E-01	4.44E-01
NDP	ENSG00000124479	6.50E-01	8.76E-01	4	2XL	4	0	1	0	0	2	7	6	5	3	OMIM:310600	OMIM:305390	1.33E-02	7.71E-02	2.00E-01
NFIX	ENSG00000008441	9.99E-01	1.49E-01	0	2AD	4	2	5	16	3	9	9	3	2	1	OMIM:614753	OMIM:602535	4.32E-04	1.76E-02	5.00E-01
NOTCH1	ENSG00000148400	1.00E+00	9.70E-02	0	2AD	2	7	9	3	1	1	5	11	11	14	OMIM:109730	OMIM:616028	1.22E-02	7.47E-02	1.25E-01
NOTCH2	ENSG00000134250	1.00E+00	1.16E-01	0	2AD	21	3	4	3	1	2	4	0	1	1	OMIM:102500	OMIM:610205	2.81E-02	1.32E-01	2.22E-01
OCRL	ENSG00000122126	1.00E+00	1.55E-01	0	2XL	6	1	4	1	1	0	22	15	10	7	OMIM:300555	OMIM:309000	2.91E-05	3.55E-03	2.22E-01
PLP1	ENSG00000123560	9.28E-01	3.55E-01	1	2XL	4	6	3	9	4	6	2	11	5	6	OMIM:312080	OMIM:312920	8.79E-02	2.73E-01	2.31E-01
RELN	ENSG00000189056	1.00E+00	1.76E-01	0	ADAR	1	1	4	0	3	2	1	0	3	0	OMIM:257320	OMIM:616436	2.18E-02	1.06E-01	2.00E-01
ROR2	ENSG00000169071	1.24E-04	5.58E-01	2	ADAR	1	4	2	0	0	0	6	6	11	6	OMIM:113000	OMIM:268310	1.57E-02	8.73E-02	4.38E-01
SETBP1	ENSG00000152217	1.00E+00	1.10E-01	0	2AD	0	0	9	1	0	7	9	5	6	3	OMIM:616078	OMIM:269150	9.00E-04	2.05E-02	4.35E-01
SMARCA2	ENSG00000080503	1.00E+00	2.03E-01	0	2AD	0	3	17	22	1	0	4	2	1	0	OMIM:619293	OMIM:601358	9.95E-03	7.00E-02	5.65E-01
SMARCA4	ENSG00000127616	1.00E+00	5.50E-02	0	2AD	23	20	19	21	10	0	5	8	9	0	OMIM:613325	OMIM:614609	7.26E-03	5.75E-02	0.00E+00
SPTB	ENSG00000070182	1.00E+00	1.40E-01	0	2AD	7	13	11	13	12	5	0	1	0	0	OMIM:616649	OMIM:617948	1.03E-03	2.05E-02	3.75E-01
SPTBN2	ENSG00000173898	9.93E-05	3.57E-01	1	ADAR	1	1	0	2	9	1	0	1	4	1	OMIM:600224	OMIM:615386	5.09E-02	1.88E-01	6.00E-01
SRCAP	ENSG00000080603	1.00E+00	9.60E-02	0	ADAR	0	0	0	11	4	1	2	2	2	0	OMIM:619595	OMIM:136140	3.26E-03	3.06E-02	5.00E-01
STUB1	ENSG00000103266	1.87E-02	6.80E-01	3	ADAR	0	3	5	3	3	2	1	0	3	7	OMIM:618093	OMIM:615768	4.04E-02	1.59E-01	9.09E-02
TECTA	ENSG00000109927	2.99E-16	5.80E-01	2	ADAR	1	0	2	1	9	2	3	1	1	2	OMIM:601543	OMIM:603629	7.69E-02	2.61E-01	1.00E+00
TEK	ENSG00000120156	1.00E+00	1.79E-01	0	2AD	0	0	0	5	2	4	1	0	0	2	OMIM:617272	OMIM:600195	1.17E-02	7.47E-02	0.00E+00

## Sheet: bins2
List of GMDs with significant and nominally significant differences in variant localization for the two associated diseases within CDS (bins=2)
GENE	Ensembl	pLI	oe_lof_upper	oe_lof_upper_bin	Mode of inheritcance of associated diseases	OMIM1	OMIM2	OMIM1_bin1	OMIM1_bin2	OMIM2_bin1	OMIM2_bin2	p-value	FDR-adjusted p-value	Jaccard_UpperTerms
ANKH	ENSG00000154122	2.79E-01	4.99E-01	2	2AD	OMIM:118600	OMIM:123000	2	4	6	0	6.06E-02	9.91E-01	9.09E-02
ATM	ENSG00000149311	5.59E-47	7.10E-01	3	ADAR	OMIM:114480	OMIM:208900	88	123	769	737	1.23E-02	5.26E-01	5.00E-02
CDKN1C	ENSG00000129757	8.20E-01	5.29E-01	2	2AD	OMIM:130650	OMIM:614732	39	42	8	0	6.12E-03	3.38E-01	4.17E-01
COL3A1	ENSG00000168542	1.00E+00	9.80E-02	0	ADAR	OMIM:130050	OMIM:618343	307	273	11	3	6.30E-02	9.91E-01	3.91E-01
COL4A4	ENSG00000081052	6.71E-16	6.16E-01	3	ADAR	OMIM:141200	OMIM:203780	25	45	90	86	3.38E-02	7.76E-01	3.33E-01
CREBBP	ENSG00000005339	1.00E+00	6.60E-02	0	2AD	OMIM:180849	OMIM:618332	98	99	11	0	8.45E-04	1.55E-01	4.69E-01
DHH	ENSG00000139549	2.24E-01	6.75E-01	3	2AR	OMIM:233420	OMIM:607080	5	3	0	5	7.54E-02	9.91E-01	2.00E-01
EYA4	ENSG00000112319	4.87E-02	4.50E-01	2	2AD	OMIM:601316	OMIM:605362	2	9	8	5	4.72E-02	8.68E-01	5.00E-01
F8	ENSG00000185010	1.00E+00	8.90E-02	0	2XL	OMIM:301071	OMIM:306700	17	8	181	189	9.66E-02	1.00E+00	3.33E-01
FLT4	ENSG00000037280	1.00E+00	1.47E-01	0	2AD	OMIM:153100	OMIM:618780	14	0	6	6	4.01E-03	3.22E-01	8.33E-02
FN1	ENSG00000115414	1.40E-03	3.38E-01	1	2AD	OMIM:184255	OMIM:601894	0	7	5	1	4.66E-03	3.22E-01	0.00E+00
KMT2D	ENSG00000167548	1.00E+00	1.03E-01	0	2AD	OMIM:147920	OMIM:620186	235	182	6	0	3.93E-02	7.76E-01	NA
MAF	ENSG00000178573	7.44E-01	5.37E-01	2	2AD	OMIM:601088	OMIM:610202	3	9	8	2	3.00E-02	7.76E-01	8.33E-02
NALCN	ENSG00000102452	8.52E-14	5.22E-01	2	ADAR	OMIM:615419	OMIM:616266	16	12	11	24	7.20E-02	9.91E-01	4.44E-01
NDP	ENSG00000124479	6.50E-01	8.76E-01	4	2XL	OMIM:305390	OMIM:310600	6	0	14	10	7.41E-02	9.91E-01	2.00E-01
NFIX	ENSG00000008441	9.99E-01	1.49E-01	0	2AD	OMIM:602535	OMIM:614753	25	25	38	8	1.12E-03	1.55E-01	5.00E-01
SMARCA2	ENSG00000080503	1.00E+00	2.03E-01	0	2AD	OMIM:601358	OMIM:619293	8	36	4	4	7.15E-02	9.91E-01	5.65E-01
SMARCA4	ENSG00000127616	1.00E+00	5.50E-02	0	2AD	OMIM:613325	OMIM:614609	53	41	7	16	3.56E-02	7.76E-01	0.00E+00
SMC1A	ENSG00000072501	1.00E+00	6.20E-02	0	2XL	OMIM:300590	OMIM:301044	59	45	16	3	3.85E-02	7.76E-01	5.29E-01
SPTB	ENSG00000070182	1.00E+00	1.40E-01	0	2AD	OMIM:616649	OMIM:617948	28	29	7	0	1.33E-02	5.26E-01	3.75E-01
SRCAP	ENSG00000080603	1.00E+00	9.60E-02	0	ADAR	OMIM:136140	OMIM:619595	0	16	3	5	2.77E-02	7.76E-01	5.00E-01
TEK	ENSG00000120156	1.00E+00	1.79E-01	0	2AD	OMIM:600195	OMIM:617272	0	7	5	2	2.10E-02	7.24E-01	0.00E+00

## Sheet: domain boundaries
List of GMDs with significant and nominally significant differences in variant localization for the two associated diseases within protein domain boundaries
GENE	Ensembl	pLI	oe_lof_upper	oe_lof_upper_bin	Mode of inheritcance of associated diseases	OMIM1	OMIM2	p-value	FDR-adjusted p-value	Jaccard_UpperTerms
ABCA12	ENSG00000144452	1.45E-13	0.478	2	2AR	OMIM:242500	OMIM:601277	1.52E-02	6.52E-01	3.85E-01
CREBBP	ENSG00000005339	1	0.066	0	2AD	OMIM:180849	OMIM:618332	1.49E-03	1.28E-01	4.69E-01
FLT4	ENSG00000037280	1	0.147	0	2AD	OMIM:153100	OMIM:618780	1.81E-04	3.11E-02	8.33E-02
HSD17B4	ENSG00000133835	2.42E-10	0.342	0	2AR	OMIM:261515	OMIM:233400	2.21E-02	7.60E-01	4.09E-01
OCRL	ENSG00000122126	9.90E-01	0.155	0	2XL	OMIM:300555	OMIM:309000	1.09E-02	6.24E-01	2.22E-01
SMARCA2	ENSG00000080503	1.00E+00	0.203	0	2AD	OMIM:601358	OMIM:619293	5.41E-02	1.00E+00	5.65E-01
TEK	ENSG00000120156	1.00E+00	0.179	0	2AD	OMIM:600195	OMIM:617272	4.55E-02	1.00E+00	0

## Sheet: variant_type
List of GMDs with significant and nominally significant differences in variant type proportions of variants for the two associated diseases
GENE	Ensembl	pLI	oe_lof_upper	oe_lof_upper_bin	Mode of inheritance of associated diseases	OMIM1	OMIM2	OMIM1_missense	OMIM1_pLOF	OMIM2_missense	OMIM2_pLOF	p-value	FDR-adjusted p-value	Jaccard_UpperTerms
CAPN3	ENSG00000092529	3.59E-19	9.65E-01	5	ADAR	OMIM:253600	OMIM:618129	67	109	15	3	2.70E-04	5.73E-03	5.00E-01
CDKN1C	ENSG00000129757	8.20E-01	5.29E-01	2	2AD	OMIM:130650	OMIM:614732	5	55	7	1	6.07E-06	4.24E-04	4.17E-01
CHD7	ENSG00000171316	1.00E+00	7.60E-02	0	2AD	OMIM:214800	OMIM:612370	38	187	5	7	4.59E-02	4.32E-01	2.08E-01
COL4A3	ENSG00000169031	1.07E-12	5.22E-01	2	ADAR	OMIM:104200	OMIM:203780	68	23	51	65	1.00E-05	4.24E-04	1.00E+00
COL4A4	ENSG00000081052	6.71E-16	6.16E-01	3	ADAR	OMIM:141200	OMIM:203780	31	24	43	72	2.17E-02	2.42E-01	3.33E-01
CREBBP	ENSG00000005339	1.00E+00	6.60E-02	0	2AD	OMIM:180849	OMIM:618332	45	82	9	1	1.01E-03	1.65E-02	4.69E-01
CYP11B1	ENSG00000160882	8.25E-07	9.55E-01	5	ADAR	OMIM:103900	OMIM:202010	12	3	23	21	7.37E-02	5.54E-01	2.22E-01
DMD	ENSG00000198947	1.00E+00	1.54E-01	0	2XL	OMIM:300376	OMIM:310200	4	42	14	435	7.57E-02	5.54E-01	5.00E-01
EDA	ENSG00000158813	9.74E-01	2.66E-01	0	2XL	OMIM:305100	OMIM:313500	82	41	12	1	6.43E-02	5.20E-01	4.44E-01
F8	ENSG00000185010	1.00E+00	8.90E-02	0	2XL	OMIM:301071	OMIM:306700	22	2	234	77	8.10E-02	5.72E-01	3.33E-01
FLT4	ENSG00000037280	1.00E+00	1.47E-01	0	2AD	OMIM:153100	OMIM:618780	13	0	0	7	1.29E-05	4.56E-04	8.33E-02
KCNQ2	ENSG00000075043	1.00E+00	1.58E-01	0	2AD	OMIM:121200	OMIM:613720	69	25	115	13	1.93E-03	2.93E-02	5.00E-01
KMT2D	ENSG00000167548	1.00E+00	1.03E-01	0	2AD	OMIM:147920	OMIM:620186	42	221	6	0	2.47E-05	7.47E-04	0.00E+00
MEGF10	ENSG00000145794	3.90E-01	3.47E-01	1	2AR	OMIM:614399	OMIM:620249	2	8	5	0	6.99E-03	9.56E-02	0.00E+00
MPL	ENSG00000117400	4.07E-09	7.63E-01	4	ADAR	OMIM:601977	OMIM:604498	4	2	18	48	6.63E-02	5.20E-01	5.00E-01
MYBPC3	ENSG00000134571	8.01E-11	5.88E-01	3	ADAR	OMIM:115197	OMIM:615396	14	48	7	7	5.09E-02	4.32E-01	2.22E-01
NALCN	ENSG00000102452	8.52E-14	5.22E-01	2	ADAR	OMIM:615419	OMIM:616266	5	11	31	2	9.01E-06	4.24E-04	4.44E-01
NFIX	ENSG00000008441	9.99E-01	1.49E-01	0	2AD	OMIM:602535	OMIM:614753	6	35	14	21	1.82E-02	2.14E-01	5.00E-01
NOTCH1	ENSG00000148400	1.00E+00	9.70E-02	0	2AD	OMIM:109730	OMIM:616028	0	17	10	18	7.21E-03	9.56E-02	1.25E-01
NOTCH2	ENSG00000134250	1.00E+00	1.16E-01	0	2AD	OMIM:102500	OMIM:610205	0	16	5	1	2.28E-04	5.37E-03	2.22E-01
PANK2	ENSG00000125779	7.40E-07	9.67E-01	5	2AR	OMIM:234200	OMIM:607236	17	22	6	1	9.59E-02	6.56E-01	3.85E-01
PLP1	ENSG00000123560	9.28E-01	3.55E-01	1	2XL	OMIM:312080	OMIM:312920	24	3	16	10	2.76E-02	2.93E-01	2.31E-01
SETBP1	ENSG00000152217	1.00E+00	1.10E-01	0	2AD	OMIM:269150	OMIM:616078	9	3	4	13	9.53E-03	1.19E-01	4.35E-01
SLC12A6	ENSG00000140199	1.14E-02	3.95E-01	1	ADAR	OMIM:218000	OMIM:620068	0	42	5	0	6.52E-07	6.91E-05	3.85E-01
SLC26A4	ENSG00000091137	8.99E-22	1.18E+00	6	2AR	OMIM:274600	OMIM:600791	71	49	96	21	1.18E-04	3.12E-03	3.33E-01
SMARCA4	ENSG00000127616	1.00E+00	5.50E-02	0	2AD	OMIM:613325	OMIM:614609	7	43	19	1	1.80E-10	3.82E-08	0.00E+00
SMC1A	ENSG00000072501	1.00E+00	6.20E-02	0	2XL	OMIM:300590	OMIM:301044	49	21	2	10	7.36E-04	1.42E-02	5.29E-01
SPTBN2	ENSG00000173898	9.93E-05	3.57E-01	1	ADAR	OMIM:600224	OMIM:615386	10	0	3	3	3.57E-02	3.61E-01	6.00E-01
STUB1	ENSG00000103266	1.87E-02	6.80E-01	3	ADAR	OMIM:615768	OMIM:618093	12	2	7	8	5.02E-02	4.32E-01	9.09E-02
USP9X	ENSG00000124486	1.00E+00	5.10E-02	0	2XL	OMIM:300919	OMIM:300968	5	2	2	9	4.91E-02	4.32E-01	4.50E-01
